# Supplementary material for: Out-of-pocket expenditures for prevention and treatment of cardiovascular disease in general and specialised cardiac hospitals in Addis Ababa, Ethiopia: a cross-sectional cohort study
Source: PubMed Central journal article supplement — BMJ Glob Health. 2017 Jun 2;2(2):e000280. doi: 10.1136/bmjgh-2016-000280 (PMC5584490; doi:10.1136/bmjgh-2016-000280), 2017-06-02
Supplement: bmjgh-2016-000280supp002.pdf [file bmjgh-2016-000280supp002.pdf]

## Annex 2

### **Annex 2.1: Estimation of the magnitude and intensity of catastrophic health expenditure (CHE)**

The magnitude and intensity of CHE was estimated based on previously published methods as follows [1, 2]:

A household 'i' is said to have faced CHE if:

$$T_i/X_i > Z \dots\dots\dots (1)$$

Where  $T_i$  is the total out-of-pocket (OOP) payments for prevention and treatment of CVD household 'i' spent,  $X_i$  is the respective total household income and  $Z$  is the threshold chosen for CHE. In our analysis, the threshold for CHE is set at > 10% of household income.

The catastrophic headcount ( $H$ ) for the sample, the proportion of households that faced CHE, is given by:

$$H = 1/N \sum_{i=1}^N E_i,$$

$$E_i = 1 \text{ if } T_i/X_i > Z \text{ and otherwise zero} \dots\dots (2),$$

where  $N$  is the sample size.

Households use various coping mechanisms other than current income to meet the OOP payments, we therefore deducted the amount of OOP payments financed through sources other than current income to estimate the adjusted CHE rate as recommended by others [3, 4].

The mean positive overshoot, the average amount by which households that suffered CHE exceeded the 10% household income threshold, was used to estimate the intensity of financial catastrophe households faced. We first assessed the catastrophic overshoot (*O*) defined as:

Overshoot (*O*) for household 'i' is given by:

$$O_i = E_i((T_i/X_i) - Z) \dots \dots \dots (3)$$

Overshoot for the sample:

$$O = 1/N \sum_{i=1}^N O_i \dots \dots \dots (4)$$

Mean Positive Overshoot (*MPO*) = *O*/*H*..... (2 & 4)

**Annex 2.2: Household out-of-pocket expenditure**

**Table A.2.2.1.** Annual out-of-pocket payment for prevention and treatment of cardiovascular disease in general and specialized hospitals in Addis Ababa, Ethiopia in 2015 US\$.

|                               | <b>OOP payment*</b> | <b>Mean</b>  | <b>(SD)**</b> | <b>Median</b> | <b>(iqr)***</b> | <b>N</b> |
|-------------------------------|---------------------|--------------|---------------|---------------|-----------------|----------|
| <b>Public hospitals</b>       | total               | <b>96.6</b>  | (172.9)       | <b>45.4</b>   | (68.8)          | 306      |
|                               | out-patient         | <b>70.5</b>  | (123.2)       | <b>41.0</b>   | (60.5)          | 294      |
|                               | in-patient          | <b>246.1</b> | (239.5)       | <b>195.1</b>  | (234.1)         | 40       |
| <b>Private hospitals</b>      | total               | <b>582.5</b> | (600.4)       | <b>390.2</b>  | (514.4)         | 283      |
|                               | out-patient         | <b>447.0</b> | (448.1)       | <b>340.6</b>  | (371.0)         | 273      |
|                               | in-patient          | <b>722.4</b> | (577.5)       | <b>570.7</b>  | (535.7)         | 60       |
| <b>Ischemic heart disease</b> | total               | <b>403.4</b> | (519.2)       | <b>239.0</b>  | (452.4)         | 233      |
|                               | out-patient         | <b>308.3</b> | (366.9)       | <b>183.4</b>  | (355.6)         | 225      |
|                               | in-patient          | <b>666.6</b> | (502.0)       | <b>590.2</b>  | (402.0)         | 41       |
| <b>Stroke</b>                 | total               | <b>451.0</b> | (585.1)       | <b>243.9</b>  | (511.0)         | 83       |
|                               | out-patient         | <b>229.9</b> | (318.9)       | <b>78.0</b>   | (307.3)         | 71       |
|                               | in-patient          | <b>511.8</b> | (569.3)       | <b>378.0</b>  | (341.5)         | 39       |
| <b>Hypertension</b>           | total               | <b>229.4</b> | (444.2)       | <b>60.6</b>   | (249.9)         | 235      |
|                               | out-patient         | <b>203.4</b> | (398.6)       | <b>58.5</b>   | (219.8)         | 233      |
|                               | in-patient          | <b>367.5</b> | (517.1)       | <b>243.9</b>  | (248.8)         | 18       |
| <b>Dyslipidemia</b>           | total               | <b>217.8</b> | (337.5)       | <b>84.1</b>   | (244.4)         | 38       |
|                               | out-patient         | <b>198.9</b> | (311.3)       | <b>78.3</b>   | (178.5)         | 38       |
|                               | in-patient          | <b>291.9</b> | (59.9)        | <b>329.3</b>  | (85.4)          | 2        |
| <b>Reside in Addis</b>        | total               | <b>296.7</b> | (478.8)       | <b>103.2</b>  | (339.0)         | 470      |
|                               | out-patient         | <b>223.9</b> | (351.8)       | <b>79.0</b>   | (281.0)         | 452      |
|                               | in-patient          | <b>534.2</b> | (546.0)       | <b>378.0</b>  | (494.3)         | 76       |
| <b>Reside outside Addis</b>   | total               | <b>464.6</b> | (549.0)       | <b>271.0</b>  | (570.3)         | 119      |
|                               | out-patient         | <b>363.8</b> | (435.9)       | <b>219.5</b>  | (429.3)         | 115      |
|                               | in-patient          | <b>580.2</b> | (494.7)       | <b>465.9</b>  | (824.4)         | 24       |
| <b>Income quintiles ****</b>  | Q1                  | <b>102.1</b> | (170.7)       | <b>35.9</b>   | (91.2)          | 121      |
|                               | Q2                  | <b>219.5</b> | (465.6)       | <b>59.1</b>   | (203.4)         | 157      |
|                               | Q3                  | <b>318.2</b> | (403.2)       | <b>136.1</b>  | (405.9)         | 96       |
|                               | Q4                  | <b>464.1</b> | (571.9)       | <b>293.2</b>  | (443.7)         | 128      |
|                               | Q5                  | <b>617.1</b> | (606.9)       | <b>390.2</b>  | (584.1)         | 87       |

\* out-of-pocket payment \*\*standard deviation \*\*\* interquartile range \*\*\*\* total annual out-of-pocket payment both for out-patient and in-patient care disaggregated by income quintiles

**Table A.2.2.2.** Distribution of the study population by the type of hospital visited

|              | Public hospitals |             | Private hospitals |             |
|--------------|------------------|-------------|-------------------|-------------|
|              | Percent (%)      | [95 % CI]†  | Percent           | [95 % CI]†  |
| <b>Total</b> | <b>51.8</b>      | [47.5 56.1] | <b>48.2</b>       | [43.9 52.5] |
| <b>Q1</b>    | <b>86.5</b>      | [78.0 93.0] | <b>13.5</b>       | [7.0 20.0]  |
| <b>Q2</b>    | <b>76.6</b>      | [69.4 93.8] | <b>23.4</b>       | [16.1 30.6] |
| <b>Q3</b>    | <b>46.0</b>      | [35.3 56.6] | <b>54.0</b>       | [43.4 64.7] |
| <b>Q4</b>    | <b>30.3</b>      | [21.6 38.9] | <b>69.7</b>       | [61.1 78.4] |
| <b>Q5</b>    | <b>6.3</b>       | [0.3 12.3]  | <b>93.7</b>       | [87.7 99.7] |

† 95% confidence interval for the mean

**Table A.2.2.3** Time lost by patients due to illness related to cardiovascular disease or while seeking care for cardiovascular disease in Addis Ababa over one and twelve months period.

| Time lost in number days |            |                          |            |
|--------------------------|------------|--------------------------|------------|
| Time lost over 1 month   | Percent(%) | Time lost over 12 months | Percent(%) |
| <=1                      | 73.7       | <= 7                     | 68.4       |
| 2 - 7                    | 17.7       | 8 -14                    | 11.9       |
| > 7                      | 8.6        | > 14                     | 19.7       |

## REFERENCE

1. Wagstaff, A., *Measuring financial protection in health*. World Bank Policy Research Working Paper Series, Vol, 2008.
2. Wagstaff, A. and E.v. Doorslaer, *Catastrophe and impoverishment in paying for health care: with applications to Vietnam 1993–1998*. Health economics, 2003. **12**(11): p. 921-933.
3. Leive, A. and K. Xu, *Coping with out-of-pocket health payments: empirical evidence from 15 African countries*. Bulletin of the World Health Organization, 2008. **86**(11): p. 849-856C.
4. Flores, G., et al., *Coping with health-care costs: implications for the measurement of catastrophic expenditures and poverty*. Health economics, 2008. **17**(12): p. 1393-1412.
